# Supplementary material for: A flexible, nonenzymatic glucose biosensor based on Ni-coordinated, vertically aligned carbon nanotube arrays
Source: Royal Society of Chemistry journal article supplement (doi:10.1039/c4ra07615j), 2014-01-01
Supplement: c4ra07615j1.pdf [file c4ra07615j1.pdf]

Electronic Supplementary Information

Flexible, nonenzymatic glucose biosensor based on Ni-coordinated, vertically  
aligned carbon nanotube arrays

Wan-Sun Kim,<sup>§,a,b</sup> Gi-Ja Lee<sup>§,a,b</sup> Je-Hwang Ryu,<sup>a</sup> Kyu-Chang Park,<sup>c,\*</sup> and Hun-Kuk Park<sup>a,b\*</sup>

<sup>a</sup> Department of Biomedical Engineering & Healthcare Industry Research Institute, College of Medicine,  
Kyung Hee University, Seoul 130-701, Korea

<sup>b</sup> Department of Medical Engineering, Graduate School, Kyung Hee University, Seoul 130-701, Korea

<sup>c</sup> Department of Information Display and Advanced Display Research Center, Kyung Hee University,  
Seoul 130-701, Korea

<sup>§</sup> These authors contributed equally to this paper

\* To whom correspondence should be addressed. E-mail: sigmoidus@khu.ac.kr, kyupark@khu.ac.kr

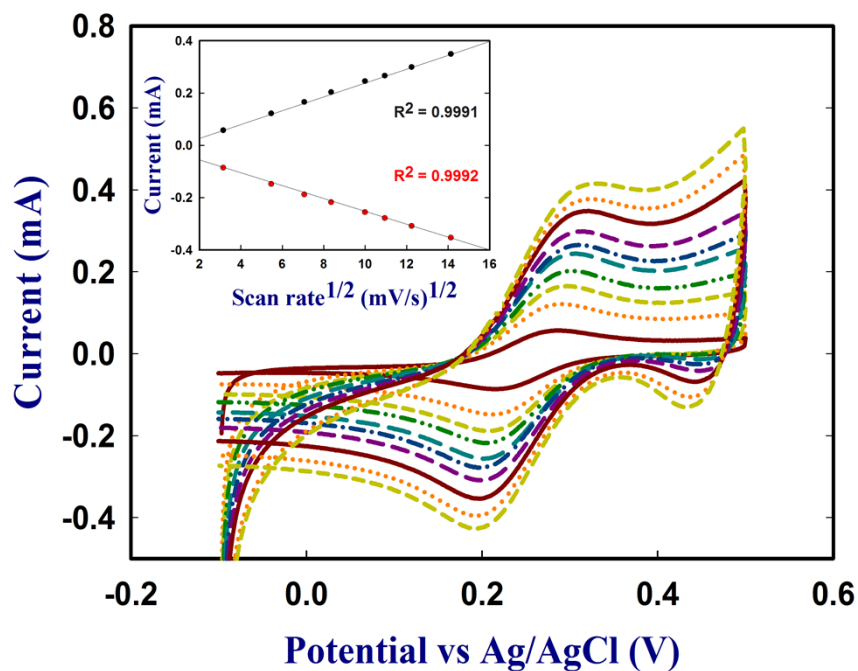

**Fig. S1** Cyclic voltammograms of Ni/VCNTs/G electrode in 5.0 mM  $K_3[Fe(CN)_6]$  containing 1.0 M KCl in 1.0 M phosphate buffered saline at different scan rates (10 – 200  $mV \cdot s^{-1}$ ). Insets are the plots of peak current vs. scan rate<sup>1/2</sup>. The electrochemical active surface area of the Ni/VCNTs/G was calculated by Randles–Sevcik equation:

$$I_p = 2.69 \times 10^5 A D^{1/2} n^{3/2} \gamma^{1/2} C$$

- $I_p$  : the peak current (A)
- $A$  : the electrochemically effective surface area of the working electrode ( $cm^2$ )
- $D$  : the diffusion coefficient ( $7.64 \times 10^{-6} cm^2 \cdot s^{-1}$  for  $K_3[Fe(CN)_6]$  at 25 °C)
- $n$  : the number of electrons involved in the reaction
- $\gamma$  : the scan rate ( $V \cdot s^{-1}$ )
- $C$  : the concentration of the reactant ( $mol \cdot cm^{-3}$ )

**Table S1.** The detection of glucose in human serum samples. (from three separate experiments)

| Sample | Concentration (mM) | RSD (%) | Added (mM) | Recovery (%) |
|--------|--------------------|---------|------------|--------------|
| 1      | 0.959              | 1.50    | 0.1        | 98.3         |
| 2      | 2.329              | 3.28    | 0.1        | 99.9         |
| 3      | 3.622              | 3.34    | 0.1        | 101.2        |
